# Supplementary material for: Sampling locality is more detectable than taxonomy or ecology in the gut microbiota of the brood-parasitic Brown-headed Cowbird (Molothrus ater)
Source: PeerJ. 2014 Mar 20;2:e321. doi: 10.7717/peerj.321 (PMC3970801; doi:10.7717/peerj.321)
Supplement: Supplemental Information 1 — Table S1: Sheet 1: Demographic and additional information about each of the bird samples used in this study. Sheet 2: Individual identification, taxonomic order, diet and source of insects and mammals used in this study. Sheet 3: The 36 bacterial genera shared by all birds, assigned by RDP Classifier. [file peerj-02-321-s001.xlsx]

## Sheet: 1.CowbirdInfo
Table S1: Sheet 1: Demographic and additional information about each of the bird samples used in this study. Sheet 2: Individual identification, taxonomic order, diet and source of insects and mammals used in this study. Sheet 3: The 36 bacterial genera shared by all birds, assigned by RDP Classifier.
Individual		Collector	LSU MNS B#	Family	Genus	Species	Sex	Weight(g)	Wingspan(mm)	Skull	Ad Juv	Stomach Contents	Herbivore, Carnivore, Omnivore	Locality	Lat	Long	Total Seqs	How Collected	Date Collected
NorthernCardinal1	NC1	DLD10182	61124	Cardinalidae	Cardinalis	cardinalis	m	39.4	280	1	JUV	nr	Herbivore	LA	N30 18" 43.9848"	W91 5' 44.4186"	12387	window kill	2002-03-22
NorthernCardinal2	NC2	DLD10184	61126	Cardinalidae	Cardinalis	cardinalis	m	45.7	nr	0.5	JUV	wm	Herbivore	LA	N30 18' 51.4224"	W91 5' 35.61"	32433	window kill	2010-09-26
NorthernCardinal3	NC3	DLD10186	61128	Cardinalidae	Cardinalis	cardinalis	f	39.4	255	1	AD	seeds	Herbivore	LA	N30 18' 51.4224"	W91 5' 35.61"	13519	shot	2006-06-04
NorthernCardinal4.1	NC4.1	DLD10185	61227	Cardinalidae	Cardinalis	cardinalis	m	32.6	272	0	AD	wm	Herbivore	LA	N30 18' 51.4224"	W91 5' 35.61"	91930	found moribund	2003-11-08
NorthernCardinal4.2	NC4.2	DLD10185	61227	Cardinalidae	Cardinalis	cardinalis	m	32.6	272	0	AD	wm	Herbivore	LA	N30 18' 51.4224"	W91 5' 35.61"	86676	found moribund	2003-11-08
HouseFinch1	HF1	DLD10158	72199	Fringillidae	Haemorhous	mexicanus	m	20.4	227	0	JUV	seeds	Herbivore	CAL	N35 40'	W118 19'	90616	assume trapped or found dead	2008-07-23
OrchardOriole1	OO1	DLD10199	81921	Icteridae	Icterus	spurius	m	22	nr	1	AD	insects_seeds	Omnivore	LA	N30 44' 49.5"	W91 10' 24.1"	65402	shot	2008-12-06
OrchardOriole2	OO2	DLD10200	81927	Icteridae	Icterus	spurius	m	20.5	nr	1	AD	insects	Omnivore	LA	N30 44' 49.5"	W91 10' 24.1"	12982	shot	2008-12-06
Cowbird01	Cow01	SWC8929	61074	Icteridae	Molothrus	ater	m	38.7	305	0	JUV	wm	Omnivore	LA	N30 18' 51.4224"	W91 5' 35.61"	132574	shot	2006-04-07
Cowbird02	Cow02	SWC8932	61077	Icteridae	Molothrus	ater	m	40.7	308	0	JUV	wm	Omnivore	LA	N30 18' 51.4224"	W91 5' 35.61"	98047	shot	2006-08-07
Cowbird03	Cow03	SWC8933	61078	Icteridae	Molothrus	ater	m	42.1	312	0	JUV	seeds	Omnivore	LA	N30 18' 51.4224"	W91 5' 35.61"	73823	shot	2006-08-07
Cowbird04	Cow04	SWC8934	61079	Icteridae	Molothrus	ater	f	33.5	287	0	JUV	wm	Omnivore	LA	N30 18' 51.4224"	W91 5' 35.61"	43991	shot	2006-09-07
Cowbird05	Cow05	SWC8935	61080	Icteridae	Molothrus	ater	f	28.5	279	0	JUV	wm	Omnivore	LA	N30 18' 51.4224"	W91 5' 35.61"	43330	shot	2006-11-07
Cowbird06	Cow06	JCC03	61109	Icteridae	Molothrus	ater	f	42.5	263	1	AD	wm	Omnivore	LA	N30 18' 51.4224"	W91 5' 35.61"	60088	trapped	2011-09-02
Cowbird07	Cow07	DLD10176	61114	Icteridae	Molothrus	ater	f	31.5	280	0	JUV	wm	Omnivore	CAL	N35 40'	W118 19'	59577	trapped	2008-07-18
Cowbird08	Cow08	JCC04	61116	Icteridae	Molothrus	ater	f	36.9	297	1	AD	wm	Omnivore	LA	N30 18' 51.4224"	W91 5' 35.61"	47239	shot	2009-05-26
Cowbird09	Cow09	SWC8894	67666	Icteridae	Molothrus	ater	f	39.7	nr	1	AD	wm	Omnivore	LA	N30 18' 51.4224"	W91 5' 35.61"	17749	shot	2010-10-05
Cowbird10	Cow10	SWC8896	67668	Icteridae	Molothrus	ater	f	36.3	293	1	AD	wm	Omnivore	LA	N30 18' 51.4224"	W91 5' 35.61"	55077	shot	2010-05-21
Cowbird11	Cow11	SWC8897	67669	Icteridae	Molothrus	ater	f	37.5	290	1	AD	wm	Omnivore	LA	N30 18' 51.4224"	W91 5' 35.61"	93550	shot	2010-05-21
Cowbird12	Cow12	SWC8901	67673	Icteridae	Molothrus	ater	f	36.2	295	1	AD	wm	Omnivore	LA	N30 18' 51.4224"	W91 5' 35.61"	5112	shot	2010-05-29
Cowbird13	Cow13	SWC8902	67674	Icteridae	Molothrus	ater	f	38	305	1	AD	wm	Omnivore	LA	N30 18' 51.4224"	W91 5' 35.61"	19722	shot	2010-05-29
Cowbird14	Cow14	SWC8903	67675	Icteridae	Molothrus	ater	m	42.2	326	1	AD	wm	Omnivore	LA	N30 18' 51.4224"	W91 5' 35.61"	138875	shot	2010-05-29
Cowbird15	Cow15	SWC8904	67676	Icteridae	Molothrus	ater	f	39.2	288	1	AD	wm	Omnivore	LA	N30 18' 51.4224"	W91 5' 35.61"	32052	shot	2010-05-31
Cowbird16	Cow16	DLD10168	67724	Icteridae	Molothrus	ater	f	26.3	274	0	JUV	wm	Omnivore	CAL	N35 40'	W118 19'	70309	trapped	2008-07-18
Cowbird17	Cow17	DLD10169	67725	Icteridae	Molothrus	ater	f	31.8	278	0.1	JUV	wm	Omnivore	CAL	N35 40'	W118 19'	62475	trapped	2008-07-18
Cowbird18	Cow18	DLD10171	67727	Icteridae	Molothrus	ater	f	23.8	276	0	JUV	wm	Omnivore	CAL	N35 40'	W118 19'	89671	trapped	2008-07-18
Cowbird19	Cow19	DLD10172	67728	Icteridae	Molothrus	ater	m	25.8	306	0	JUV	wm	Omnivore	CAL	N35 40'	W118 19'	73390	trapped	2008-07-18
Cowbird20	Cow20	DLD10173	67729	Icteridae	Molothrus	ater	f	28.6	286	0	JUV	wm	Omnivore	CAL	N35 40'	W118 19'	33848	trapped	2008-07-18
Cowbird21	Cow21	SWC8911	67734	Icteridae	Molothrus	ater	m	41.8	329	1	AD	wm	Omnivore	LA	N30 18' 51.4224"	W91 5' 35.61"	96809	shot	2010-06-14
Cowbird22	Cow22	SWC8913	67736	Icteridae	Molothrus	ater	m	39.1	320	0	JUV	wm	Omnivore	LA	N30 18' 51.4224"	W91 5' 35.61"	84006	shot	2010-06-20
Cowbird23	Cow23	SWC8914	67737	Icteridae	Molothrus	ater	f	33.6	282	1	AD	wm	Omnivore	LA	N30 18' 51.4224"	W91 5' 35.61"	68483	shot	2010-06-26
Cowbird24	Cow24	SWC8915	67738	Icteridae	Molothrus	ater	f	35.8	280	1	AD	wm	Omnivore	LA	N30 18' 51.4224"	W91 5' 35.61"	56969	shot	2010-06-27
Cowbird25	Cow25	SWC8919	67742	Icteridae	Molothrus	ater	f	30	278	0	JUV	wm	Omnivore	LA	N30 18' 51.4224"	W91 5' 35.61"	72736	shot	2010-03-07
Cowbird26	Cow26	SWC8920	67743	Icteridae	Molothrus	ater	f	31.2	287	0	JUV	wm	Omnivore	LA	N30 18' 51.4224"	W91 5' 35.61"	59907	shot	2010-03-07
Cowbird27	Cow27	DLD10159	72200	Icteridae	Molothrus	ater	f	26.8	272	1	AD	wm	Omnivore	CAL	N35 40'	W118 19'	43461	trapped	2008-07-23
Cowbird28	Cow28	DLD10160	72201	Icteridae	Molothrus	ater	f	28.6	251	0	JUV	wm	Omnivore	CAL	N35 40'	W118 19'	68573	trapped	2008-07-23
Cowbird29	Cow29	DLD10162	72203	Icteridae	Molothrus	ater	f	29.6	274	0	JUV	nr	Omnivore	CAL	N35 40'	W118 19'	52470	trapped	2008-07-14
Cowbird30	Cow30	DLD10163	72204	Icteridae	Molothrus	ater	m	32.6	274	0	JUV	nr	Omnivore	CAL	N35 40'	W118 19'	33010	trapped	2004-04-07
Cowbird31	Cow31	DLD10164	72205	Icteridae	Molothrus	ater	m	40.7	273	0	JUV	nr	Omnivore	CAL	N35 40'	W118 19'	70417	trapped	2008-07-07
Cowbird32	Cow32	DLD10166	72207	Icteridae	Molothrus	ater	f	33.7	246	0	JUV	nr	Omnivore	CAL	N35 40'	W118 19'	636535	trapped	2008-01-08
IndigoBunting1	IB1	DLD10195	81933	Cardinalidae	Passerina	cyanea	m	15.6	nr	1	AD	insects_seeds	Omnivore	LA	N30 44' 49.5"	W91 10' 24.1"	72221	shot	2008-06-13
Blue-grayGnatcatcher1	BG1	DLD10192	81919	Polioptilidae	Polioptila	caerulea	nr	5.8	nr	0	JUV	insects	Carnivore	LA	N30 44' 49.5"	W91 10' 24.1"	55921	shot	2008-12-06
Blue-grayGnatcatcher2	BG2	DLD10193	81926	Polioptilidae	Polioptila	caerulea	f	5.5	nr	nr	JUV	insects	Carnivore	LA	N30 44' 49.5"	W91 10' 24.1"	128044	shot	2008-06-13
ProthonotaryWarbler1	PW1	DLD10180	61122	Parulidae	Protonotaria	citrea	f	13	205	1	AD	insects	Carnivore	LA	N30 18" 43.9848"	W91 5' 44.4186"	44351	found dead at nest	2002-01-06
ProthonotaryWarbler2	PW2	DLD10188	61130	Parulidae	Protonotaria	citrea	m	14.4	213	0	JUV	insects_fruit	Carnivore	LA	N30 18' 51.4224"	W91 5' 35.61"	22906	window kill	2009-04-06
CarolinaWren1	CW1	DLD10187	61129	Troglodytidae	Thryothorus	ludovicianus	f	14.5	nr	0	JUV	empty	Carnivore	LA	N30 18' 51.4224"	W91 5' 35.61"	31090	moribund	2008-04-27
CarolinaWren2	CW2	DLD10191	81918	Troglodytidae	Thryothorus	ludovicianus	m	21.7	nr	nr	AD	insects	Carnivore	LA	N30 44' 49.5"	W91 10' 24.1"	45235	shot	2008-12-06
White-eyedVireo1	WV1	DLD10198	81920	Vireonidae	Vireo	griseus	m	13.9	nr	1	AD	insects	Carnivore	LA	N30 44' 49.5"	W91 10' 24.1"	52393	shot	2008-12-06
HoodedWarbler1	HW1	DLD10201	81905	Parulidae	Setophaga	citrina	m	11.3	nr	1	AD	insects	Carnivore	LA	N30 44.783'	W91 10.204'	48351	shot	2008-05-06
									nr=notRecorded			nr=notRecorded		LA=Louisiana
												wm = whiteMillet		CAL=California

## Sheet: 2.MamInsect
Sample	Source of Data	Order	Treatment	Diet (from original source)	Herbivore, Omnivore, Carnivore	Total Sequences
Calosoma peregrinator	Colman et al. 2012	Coleoptera	insect	Predacious	Carnivore	248
Gonasida inferna	Colman et al. 2012	Coleoptera	insect	Omnivorous	Omnivore	230
Apis mellifera	Colman et al. 2012	Hymenoptera	insect	Pollenivorous	Herbivore	271
Apis mellifera (hive)	Colman et al. 2012	Hymenoptera	insect	Pollenivorous	Herbivore	267
Agapostemon virescens	Colman et al. 2012	Hymenoptera	insect	Pollenivorous	Herbivore	273
Chalybion californicum	Colman et al. 2012	Hymenoptera	insect	Predacious	Carnivore	204
Coptotermes formosanus	Colman et al. 2012	Isoptera	insect	XylophagousDeadWood	Herbivore	206
Colletes inaequalis	Colman et al. 2012	Hymenoptera	insect	Pollenivorous	Herbivore	301
Calliopsis subalpinus	Colman et al. 2012	Hymenoptera	insect	Pollenivorous	Herbivore	282
Caupolicana yarrowi	Colman et al. 2012	Hymenoptera	insect	Pollenivorous	Herbivore	256
Diadasia opuntia	Colman et al. 2012	Hymenoptera	insect	Pollenivorous	Herbivore	347
Hesperapis cockerelli	Colman et al. 2012	Hymenoptera	insect	Pollenivorous	Herbivore	349
Halictus patellatus	Colman et al. 2012	Hymenoptera	insect	Pollenivorous	Herbivore	305
Megachile odontostoma	Colman et al. 2012	Hymenoptera	insect	Pollenivorous	Herbivore	338
Microcerotermes sp. M1	Colman et al. 2012	Isoptera	insect	XylophagousDeadWood	Herbivore	217
Nasutitermes sp.	Colman et al. 2012	Isoptera	insect	XylophagousDeadWood	Herbivore	1252
Philanthus gibbosus	Colman et al. 2012	Hymenoptera	insect	Predacious	Carnivore	360
Pieris rapae	Colman et al. 2012	Lepidoptera	insect	Herbivorous	Herbivore	1207
Paragia vespiformes	Colman et al. 2012	Hymenoptera	insect	Pollenivorous	Herbivore	247
Reticulitermes speratus	Colman et al. 2012	Isoptera	insect	XylophagousDeadWood	Herbivore	270
Rediviva saetigera	Colman et al. 2012	Hymenoptera	insect	Pollenivorous	Herbivore	333
Xylocopa californica	Colman et al. 2012	Hymenoptera	insect	Pollenivorous	Herbivore	305
AfricanElephant	Ley et al. 2008	Proboscidae	mammal	Herbivore	Herbivore	991
ArgaliSheep	Ley et al. 2008	Artiodactyla	mammal	Herbivore	Herbivore	540
Armadillo	Ley et al. 2008	Xenarthra	mammal	Carnivore	Carnivore	362
AsianElephant	Ley et al. 2008	Proboscidae	mammal	Herbivore	Herbivore	412
BigHornSheep	Ley et al. 2008	Artiodactyla	mammal	Herbivore	Herbivore	618
BlackBear	Ley et al. 2008	Carnivora	mammal	Omnivore	Omnivore	372
BlackhandedSpiderMonkey	Ley et al. 2008	Primates	mammal	Omnivore	Omnivore	272
BlackRhinoceros	Ley et al. 2008	Perissodactyla	mammal	Herbivore	Herbivore	287
Cheetah	Ley et al. 2008	Carnivora	mammal	Carnivore	Carnivore	267
Chimpanzee	Ley et al. 2008	Primates	mammal	Omnivore	Omnivore	290
DoucLangur	Ley et al. 2008	Primates	mammal	Herbivore	Herbivore	349
EastAngolanColubus	Ley et al. 2008	Primates	mammal	Herbivore	Herbivore	309
EasternBlackandwhiteColubus	Ley et al. 2008	Primates	mammal	Herbivore	Herbivore	204
Echidna	Ley et al. 2008	Monotremata	mammal	Carnivore	Carnivore	393
FlyingFox	Ley et al. 2008	Chiroptera	mammal	Omnivore	Omnivore	228
FrancoisLangur	Ley et al. 2008	Primates	mammal	Herbivore	Herbivore	362
GeoffreysMarmoset	Ley et al. 2008	Primates	mammal	Omnivore	Omnivore	202
GiantPanda	Ley et al. 2008	Carnivora	mammal	Herbivore	Herbivore	564
GrevysZebra	Ley et al. 2008	Perissodactyla	mammal	Herbivore	Herbivore	207
HamadryasBaboon	Ley et al. 2008	Primates	mammal	Omnivore	Omnivore	367
Hedgehog	Ley et al. 2008	Insectivora	mammal	Carnivore	Carnivore	211
Horse	Ley et al. 2008	Perissodactyla	mammal	Herbivore	Herbivore	509
Lion	Ley et al. 2008	Carnivora	mammal	Carnivore	Carnivore	409
Molerat	Ley et al. 2008	Rodentia	mammal	Herbivore	Herbivore	318
MongooseLemur	Ley et al. 2008	Primates	mammal	Omnivore	Omnivore	281
Okapi	Ley et al. 2008	Artiodactyla	mammal	Herbivore	Herbivore	391
Orangutan	Ley et al. 2008	Primates	mammal	Herbivore	Herbivore	497
PolarBear	Ley et al. 2008	Carnivora	mammal	Carnivore	Carnivore	485
RedKangaroo	Ley et al. 2008	Diprotodontia	mammal	Herbivore	Herbivore	273
RedPanda	Ley et al. 2008	Carnivora	mammal	Herbivore	Herbivore	1144
SebasShortTailedBat	Ley et al. 2008	Chiroptera	mammal	Omnivore	Omnivore	268
SpekesGazelle	Ley et al. 2008	Artiodactyla	mammal	Herbivore	Herbivore	454
SpottedHyena	Ley et al. 2008	Carnivora	mammal	Carnivore	Carnivore	257
Squirrel	Ley et al. 2008	Rodentia	mammal	Omnivore	Omnivore	222
TranscaspianUrialSheep	Ley et al. 2008	Artiodactyla	mammal	Herbivore	Herbivore	301
WesternLowlandGorilla	Ley et al. 2008	Primates	mammal	Herbivore	Herbivore	468
WhitefacedSaki	Ley et al. 2008	Primates	mammal	Omnivore	Omnivore	416
Zebra	Ley et al. 2008	Perissodactyla	mammal	Herbivore	Herbivore	229

## Sheet: 3.BactGenera
Phylum	Class	Order	Family	Genus
Actinobacteria	Actinobacteria	Actinomycetales	Corynebacteriaceae	Corynebacterium
Actinobacteria	Actinobacteria	Actinomycetales	Dietziaceae	Dietzia
Actinobacteria	Actinobacteria	Actinomycetales	Micrococcaceae	Micrococcus
Actinobacteria	Actinobacteria	Actinomycetales	Propionibacteriaceae	Propionibacterium
Bacteroidetes	Flavobacteria	Flavobacteriales	Flavobacteriaceae	Chryseobacterium
Bacteroidetes	Flavobacteria	Flavobacteriales	Flavobacteriaceae	Planobacterium
Firmicutes	Bacilli	Bacillales	Bacillaceae	Anoxybacillus
Firmicutes	Bacilli	Bacillales	Staphylococcaceae	Staphylococcus
Firmicutes	Bacilli	Lactobacillales	Carnobacteriaceae	Marinilactibacillus
Firmicutes	Bacilli	Lactobacillales	Lactobacillaceae	Lactobacillus
Firmicutes	Bacilli	Lactobacillales	Leuconostocaceae	Leuconostoc
Firmicutes	Bacilli	Lactobacillales	Leuconostocaceae	Weissella
Firmicutes	Bacilli	Lactobacillales	Streptococcaceae	Lactococcus
Firmicutes	Bacilli	Lactobacillales	Streptococcaceae	Streptococcus
Firmicutes	Clostridia	Clostridiales	Clostridiaceae	Clostridium
Firmicutes	Clostridia	Clostridiales	Veillonellaceae	Veillonella
Proteobacteria	Alphaproteobacteria	Rhizobiales	Methylobacteriaceae	Methylobacterium
Proteobacteria	Alphaproteobacteria	Rhizobiales	Xanthobacteraceae	Xanthobacter
Proteobacteria	Alphaproteobacteria	Sphingomonadales	Sphingomonadaceae	Sphingobium
Proteobacteria	Betaproteobacteria	Burkholderiales	Burkholderiales_incertae_sedis	Aquabacterium
Proteobacteria	Betaproteobacteria	Burkholderiales	Burkholderiales_incertae_sedis	Tepidimonas
Proteobacteria	Betaproteobacteria	Burkholderiales	Comamonadaceae	Acidovorax
Proteobacteria	Betaproteobacteria	Burkholderiales	Comamonadaceae	Curvibacter
Proteobacteria	Betaproteobacteria	Burkholderiales	Comamonadaceae	Diaphorobacter
Proteobacteria	Betaproteobacteria	Burkholderiales	Comamonadaceae	Schlegelella
Proteobacteria	Betaproteobacteria	Burkholderiales	Oxalobacteraceae	Janthinobacterium
Proteobacteria	Epsilonproteobacteria	Campylobacterales	Campylobacteraceae	Campylobacter
Proteobacteria	Epsilonproteobacteria	Campylobacterales	Helicobacteraceae	Helicobacter
Proteobacteria	Gammaproteobacteria	Aeromonadales	Aeromonadaceae	Aeromonas
Proteobacteria	Gammaproteobacteria	Enterobacteriales	Enterobacteriaceae	Cronobacter
Proteobacteria	Gammaproteobacteria	Enterobacteriales	Enterobacteriaceae	Escherichia/Shigella
Proteobacteria	Gammaproteobacteria	Enterobacteriales	Enterobacteriaceae	Kluyvera
Proteobacteria	Gammaproteobacteria	Pseudomonadales	Moraxellaceae	Acinetobacter
Proteobacteria	Gammaproteobacteria	Pseudomonadales	Moraxellaceae	Enhydrobacter
Proteobacteria	Gammaproteobacteria	Pseudomonadales	Pseudomonadaceae	Pseudomonas
Proteobacteria	Gammaproteobacteria	Xanthomonadales	Xanthomonadaceae	Stenotrophomonas
